# Supplementary material
Source: MDPI journal article supplement (https://www.mdpi.com/2073-4441/15/2/351)
Supplement: s1 [file s1]

Table S1. Results of multiple comparisons of the different treatments presented in Fig. 1a.

|        | 0d | 2d | 4d | 6d | 8d | 10d | 12d | 14d | 16d | 18d | 20d |
|--------|----|----|----|----|----|-----|-----|-----|-----|-----|-----|
| 0.02-1 | a  | a  | a  | a  | ab | a   | a   | a   | a   | a   | a   |
| 0.02-5 | a  | a  | ab | ab | a  | a   | a   | a   | ab  | ab  | ab  |
| 0.05-1 | a  | a  | ab | bc | ab | a   | a   | ab  | ab  | bc  | bc  |
| 0.05-5 | a  | a  | ab | b  | ab | a   | a   | ab  | abc | ab  | b   |
| 0.1-1  | a  | a  | b  | d  | cd | b   | b   | b   | c   | c   | d   |
| 0.1-5  | a  | a  | ab | cd | bc | a   | ab  | ab  | bc  | cd  | cd  |
| 0.5-1  | a  | a  | b  | d  | e  | c   | d   | c   | d   | e   | d   |
| 0.5-5  | a  | a  | b  | d  | de | d   | c   | c   | d   | e   | e   |

Table S2. Results of multiple comparisons of the different treatments presented in Fig. 1b.

|        | 2d | 4d | 6d | 8d | 10d | 12d | 14d | 16d | 18d | 20d |
|--------|----|----|----|----|-----|-----|-----|-----|-----|-----|
| 0.02-1 | a  | a  | ab | ab | ab  | a   | ab  | a   | ab  | a   |
| 0.02-5 | ab | a  | a  | a  | ab  | ab  | ab  | a   | ab  | a   |
| 0.05-1 | ab | ab | ab | ab | ab  | a   | ab  | ab  | ab  | a   |
| 0.05-5 | ab | ab | ab | a  | ab  | ab  | ab  | ab  | a   | a   |
| 0.1-1  | ab | ab | b  | ab | ab  | ab  | ab  | ab  | ab  | a   |
| 0.1-5  | a  | ab | b  | a  | a   | ab  | ab  | ab  | ab  | a   |
| 0.5-1  | b  | b  | b  | b  | b   | b   | a   | ab  | b   | a   |
| 0.5-5  | ab | b  | b  | ab | ab  | ab  | b   | b   | ab  | a   |

Table S3. Results of multiple comparisons of the different treatments presented in Fig. 2.

|        | 0d | 2d | 4d | 6d | 8d | 10d | 12d | 14d | 16d | 18d | 20d |
|--------|----|----|----|----|----|-----|-----|-----|-----|-----|-----|
| 0.02-1 | a  | a  | a  | a  | a  | a   | a   | a   | a   | a   | a   |
| 0.02-5 | a  | a  | a  | ab | ab | bc  | b   | ab  | a   | a   | a   |
| 0.05-1 | a  | a  | a  | ab | ab | abc | b   | bc  | ab  | a   | a   |
| 0.05-5 | a  | a  | a  | a  | ab | abc | b   | ab  | a   | a   | a   |
| 0.1-1  | a  | a  | a  | b  | b  | c   | b   | de  | c   | a   | a   |
| 0.1-5  | a  | a  | a  | a  | a  | abc | b   | cd  | bc  | a   | a   |
| 0.5-1  | a  | a  | a  | ab | b  | bc  | b   | e   | d   | c   | c   |
| 0.5-5  | a  | a  | a  | a  | a  | ab  | b   | e   | d   | b   | b   |

Table S4. Effect of pulse treatments and phosphate on the chl-a of *C. ovalisporum* by two-way ANOVA.

| Influence factor | 2d   |      | 4d   |      | 6d    |      | 8d    |      | 10d   |      |
|------------------|------|------|------|------|-------|------|-------|------|-------|------|
|                  | F    | p    | F    | p    | F     | p    | F     | p    | F     | p    |
| Pulse treatments | 0.50 | 0.49 | 0.00 | 0.99 | 10.13 | 0.01 | 7.45  | 0.01 | 1.06  | 0.32 |
| Phosphate        | 0.46 | 0.71 | 0.91 | 0.46 | 2.16  | 0.13 | 1.19  | 0.34 | 2.06  | 0.15 |
| Interaction      | 1.38 | 0.28 | 1.95 | 0.16 | 5.73  | 0.01 | 11.00 | 0.00 | 10.92 | 0.00 |
| Influence factor | 12d  |      | 14d  |      | 16d   |      | 18d   |      | 20d   |      |
|                  | F    | p    | F    | p    | F     | p    | F     | p    | F     | p    |
| Pulse treatments | 0.69 | 0.42 | 0.06 | 0.81 | 1.06  | 0.32 | 7.19  | 0.02 | 24.07 | 0.00 |

|             |       |      |       |      |        |      |        |      |        |      |
|-------------|-------|------|-------|------|--------|------|--------|------|--------|------|
| Phosphate   | 11.38 | 0.00 | 84.41 | 0.00 | 130.26 | 0.00 | 133.83 | 0.00 | 193.84 | 0.00 |
| Interaction | 6.67  | 0.00 | 2.12  | 0.14 | 0.48   | 0.70 | 6.28   | 0.01 | 24.13  | 0.00 |

Table S5. Results of multiple comparisons of the different treatments presented in Fig. 3a.

|        | 0d | 2d | 4d | 6d | 8d  | 10d | 12d | 14d | 16d | 18d | 20d |
|--------|----|----|----|----|-----|-----|-----|-----|-----|-----|-----|
| 0.02-1 | a  | a  | a  | a  | ab  | a   | ab  | a   | a   | a   | a   |
| 0.02-5 | a  | a  | ab | a  | a   | a   | ab  | a   | a   | b   | ab  |
| 0.05-1 | a  | a  | c  | b  | bc  | a   | ab  | a   | b   | bc  | b   |
| 0.05-5 | a  | a  | ab | b  | ab  | a   | ab  | a   | b   | b   | ab  |
| 0.1-1  | a  | a  | bc | b  | abc | a   | ab  | a   | b   | d   | c   |
| 0.1-5  | a  | a  | bc | b  | c   | a   | a   | a   | b   | d   | c   |
| 0.5-1  | a  | a  | bc | b  | abc | a   | ab  | a   | b   | d   | d   |
| 0.5-5  | a  | a  | bc | b  | abc | a   | b   | a   | b   | cd  | cd  |

Table S6. Results of multiple comparisons of the different treatments presented in Fig. 3b.

|        | 0d  | 2d | 4d | 6d | 8d  | 10d | 12d | 14d | 16d | 18d | 20d |
|--------|-----|----|----|----|-----|-----|-----|-----|-----|-----|-----|
| 0.02-1 | a   | a  | a  | a  | abc | abc | bc  | a   | a   | a   | a   |
| 0.02-5 | c   | a  | a  | a  | a   | a   | a   | ab  | a   | ab  | a   |
| 0.05-1 | abc | a  | c  | b  | bcd | abc | abc | ab  | b   | b   | a   |
| 0.05-5 | abc | a  | ab | b  | ab  | ab  | abc | ab  | b   | b   | a   |
| 0.1-1  | ab  | a  | c  | bc | cde | bc  | abc | a   | b   | c   | b   |
| 0.1-5  | bc  | a  | bc | cd | de  | abc | ab  | a   | b   | c   | b   |
| 0.5-1  | ab  | a  | c  | d  | e   | c   | bc  | ab  | b   | c   | c   |
| 0.5-5  | abc | a  | c  | cd | cde | bc  | c   | b   | b   | c   | c   |

Table S7. Results of multiple comparisons of the different treatments presented in Fig. 4a.

|        | 0d | 2d | 4d | 6d | 8d | 10d | 12d | 14d | 16d | 18d | 20d |
|--------|----|----|----|----|----|-----|-----|-----|-----|-----|-----|
| 0.02-1 | a  | a  | ab | a  | a  | a   | a   | a   | a   | ab  | ab  |
| 0.02-5 | a  | a  | a  | a  | a  | a   | ab  | a   | a   | ab  | abc |
| 0.05-1 | a  | a  | ab | a  | a  | a   | ab  | a   | a   | ab  | b   |
| 0.05-5 | a  | a  | ab | ab | a  | a   | a   | a   | a   | a   | a   |
| 0.1-1  | a  | ab | b  | a  | a  | a   | bc  | a   | a   | a   | a   |
| 0.1-5  | a  | a  | ab | ab | a  | a   | a   | a   | a   | ab  | a   |
| 0.5-1  | a  | bc | c  | ab | b  | b   | c   | b   | b   | bc  | abc |
| 0.5-5  | a  | c  | c  | b  | b  | b   | c   | b   | b   | b   | c   |

Table S8. Results of multiple comparisons of the different treatments presented in Fig. 4b.

|        | 0d | 2d  | 4d | 6d | 8d  | 10d | 12d | 14d | 16d | 18d | 20d |
|--------|----|-----|----|----|-----|-----|-----|-----|-----|-----|-----|
| 0.02-1 | a  | ab  | ab | a  | abc | ab  | ab  | b   | abc | a   | ab  |
| 0.02-5 | a  | a   | ab | a  | bc  | a   | ab  | a   | a   | a   | ab  |
| 0.05-1 | a  | a   | a  | a  | abc | abc | ab  | a   | abc | a   | b   |
| 0.05-5 | a  | abc | ab | a  | bc  | ab  | a   | a   | ab  | a   | ab  |
| 0.1-1  | a  | abc | ab | a  | ab  | bc  | ab  | a   | ab  | a   | ab  |
| 0.1-5  | a  | abc | ab | a  | a   | ab  | ab  | a   | a   | a   | a   |

|       |   |    |    |   |     |   |   |   |    |   |    |
|-------|---|----|----|---|-----|---|---|---|----|---|----|
| 0.5-1 | a | c  | b  | a | c   | c | c | b | c  | a | ab |
| 0.5-5 | a | bc | ab | a | abc | c | b | a | bc | a | ab |

Table S9. Results of multiple comparisons of the different treatments presented in Fig. 6.

|        | 0d | 2d  | 4d | 6d  | 8d | 10d | 12d | 14d | 16d | 18d | 20d |
|--------|----|-----|----|-----|----|-----|-----|-----|-----|-----|-----|
| 0.02-1 | a  | c   | c  | c   | d  | c   | d   | d   | d   | d   | d   |
| 0.02-5 | a  | bc  | b  | bc  | cd | b   | c   | c   | cd  | cd  | cd  |
| 0.05-1 | a  | abc | b  | abc | bc | ab  | bc  | bc  | c   | bc  | bc  |
| 0.05-5 | a  | bc  | b  | bc  | bc | ab  | c   | c   | bc  | bc  | bc  |
| 0.1-1  | a  | bc  | b  | a   | ab | ab  | ab  | ab  | ab  | b   | b   |
| 0.1-5  | a  | abc | b  | ab  | bc | ab  | ab  | ab  | ab  | b   | b   |
| 0.5-1  | a  | ab  | a  | a   | a  | a   | a   | a   | a   | a   | a   |
| 0.5-5  | a  | a   | a  | a   | a  | a   | a   | a   | a   | a   | a   |

Table S10 Results of multiple comparisons of the different treatments presented in Fig. 7.

|        | 4d | 8d | 12d | 16d | 20d |
|--------|----|----|-----|-----|-----|
| 0.02-1 | a  | c  | b   | b   | b   |
| 0.02-5 | a  | bc | b   | b   | b   |
| 0.05-1 | a  | bc | b   | b   | b   |
| 0.05-5 | a  | bc | b   | b   | b   |
| 0.1-1  | a  | ab | b   | b   | b   |
| 0.1-5  | a  | bc | b   | b   | b   |
| 0.5-1  | a  | a  | a   | a   | a   |
| 0.5-5  | a  | a  | a   | a   | a   |
